# Supplementary material
Source: publisher figshare collection journal article supplement (https://karger.figshare.com/articles/dataset/_/25780344)

**Fig. s1** Conditional logistic regression within the MED12L region using Exome_Asian array, Exome_Fine array and the merge array. (a) Association of the rs199780529 with guttate psoriasis in Exome_Fine array, p= 1.25x10-2. (b) Association of the rs199780529 with guttate psoriasis in Exome_Asian array, p= 3.32 x10-2. (c) Association of the rs199780529 with guttate psoriasis in the merge array, p= 1.09 x10-2.


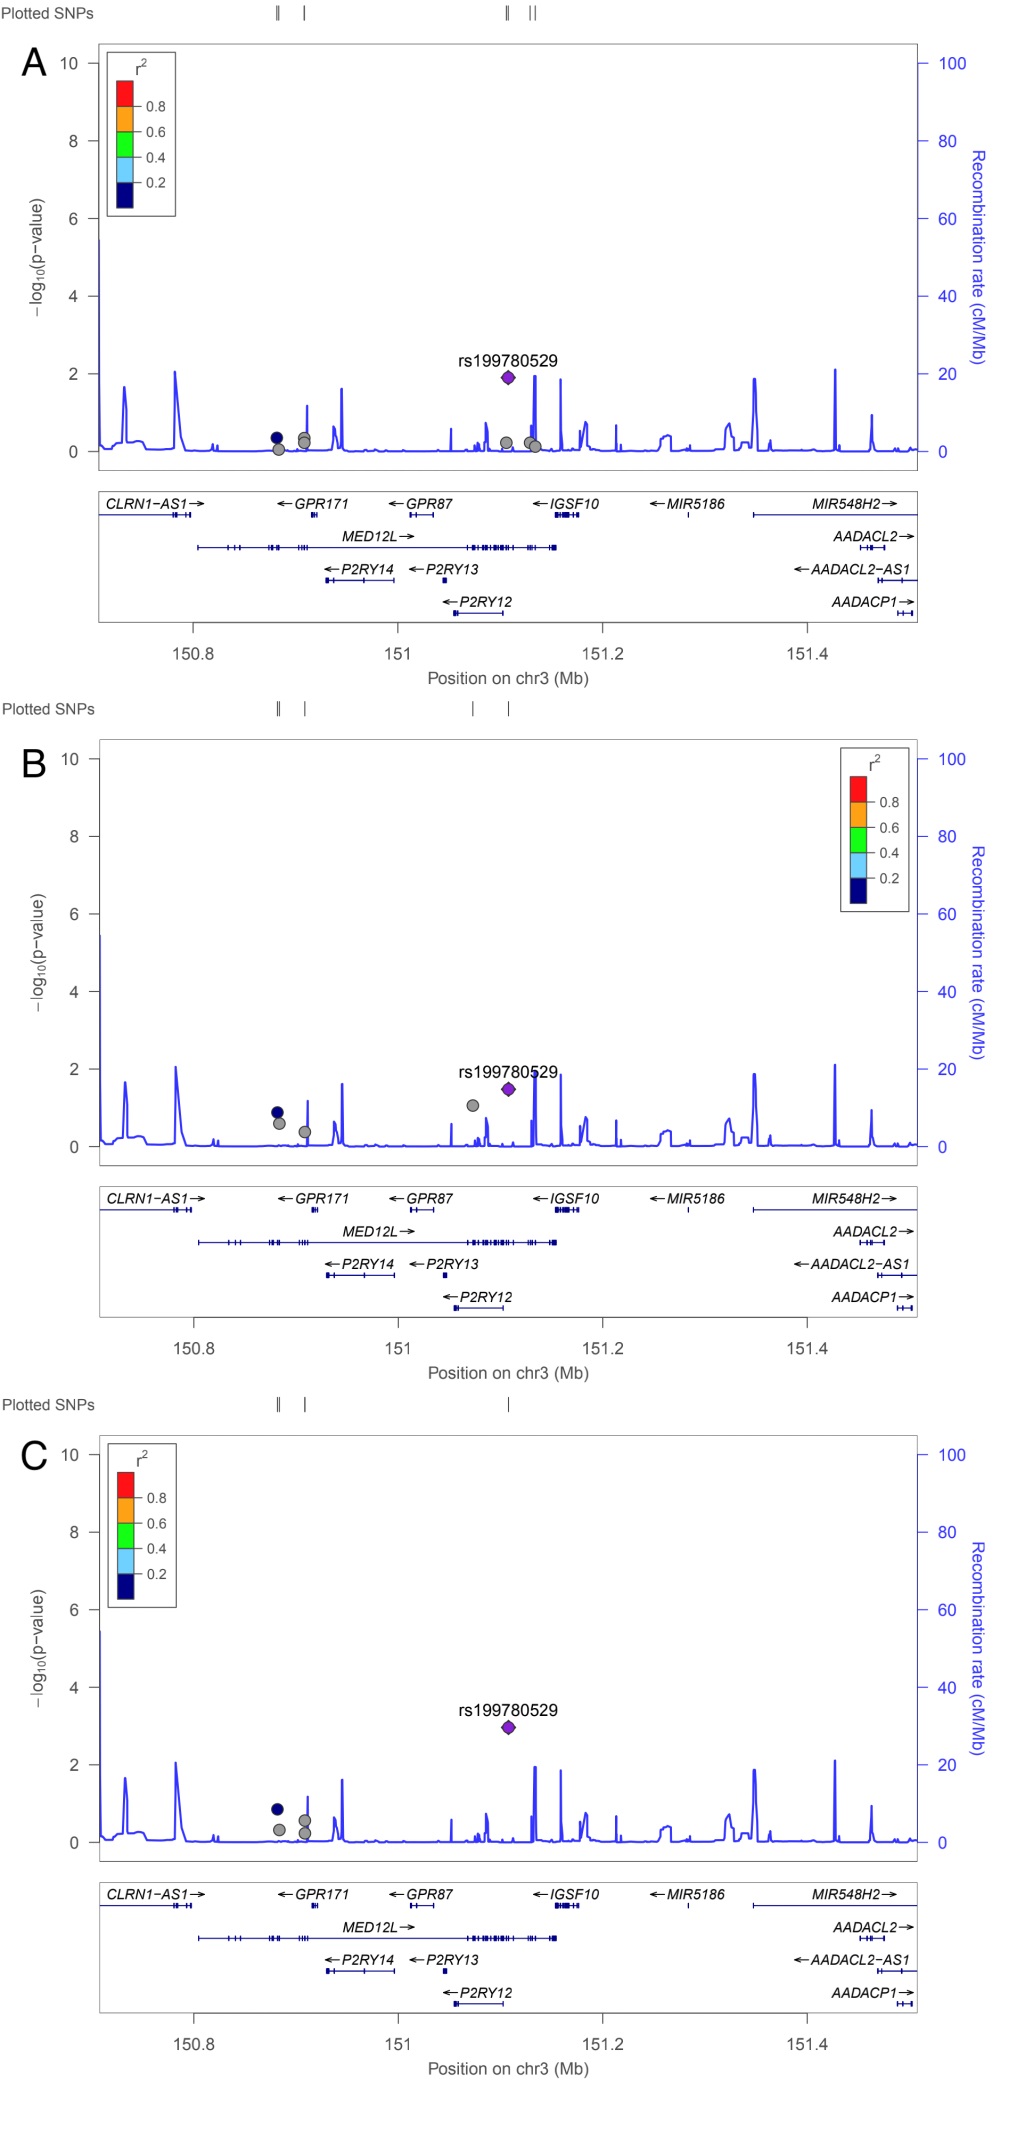

Supplement: Supplementary file 1 [file 1]
